# Supplementary material
Source: publisher site journal article supplement (http://kjim.org/upload/media/kjim-2020-629-suppl9.pdf)
Supplement: Supplementary file 1 [file kjim-2020-629-suppl9.pdf]

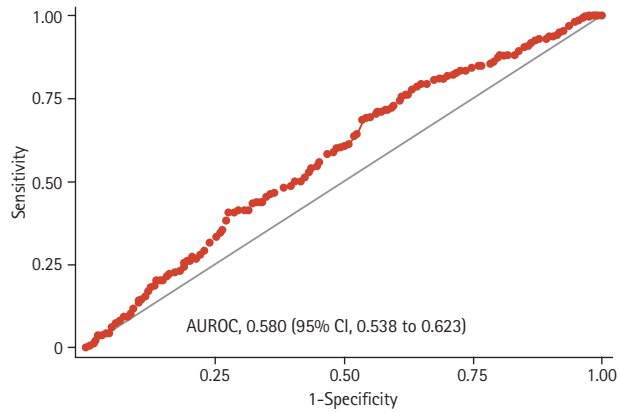

**A** Changes in waist circumference

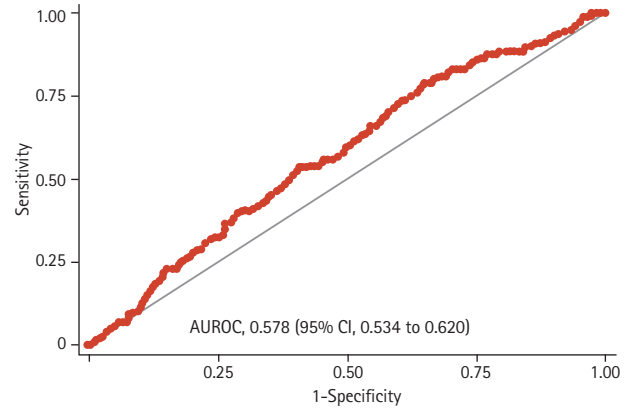

**B** Changes in waist-height ratio

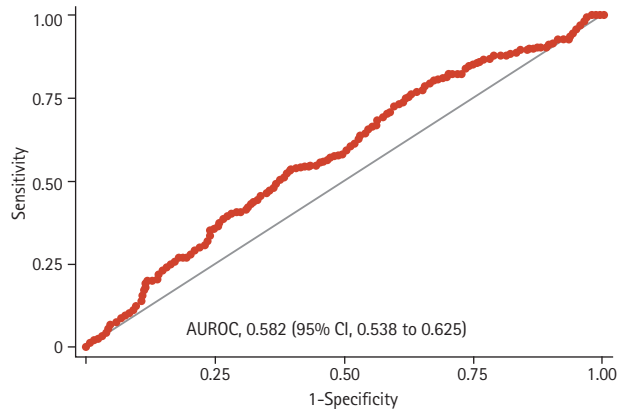

**C** Changes in body roundness index

**Supplementary Figure 3.** Area under the receiver operating characteristic curve (AUROC) for changes in central fatness. (A) Changes in waist circumference, (B) change in waist-height ratio, and (C) changes in body roundness index. CI, confidence interval.
